# Supplementary material
Source: Springer Nature journal article supplement (https://www.springermedizin.de/resource/supplementary/13058_2009_2532_MOESM13_ESM.pdf/9701624)

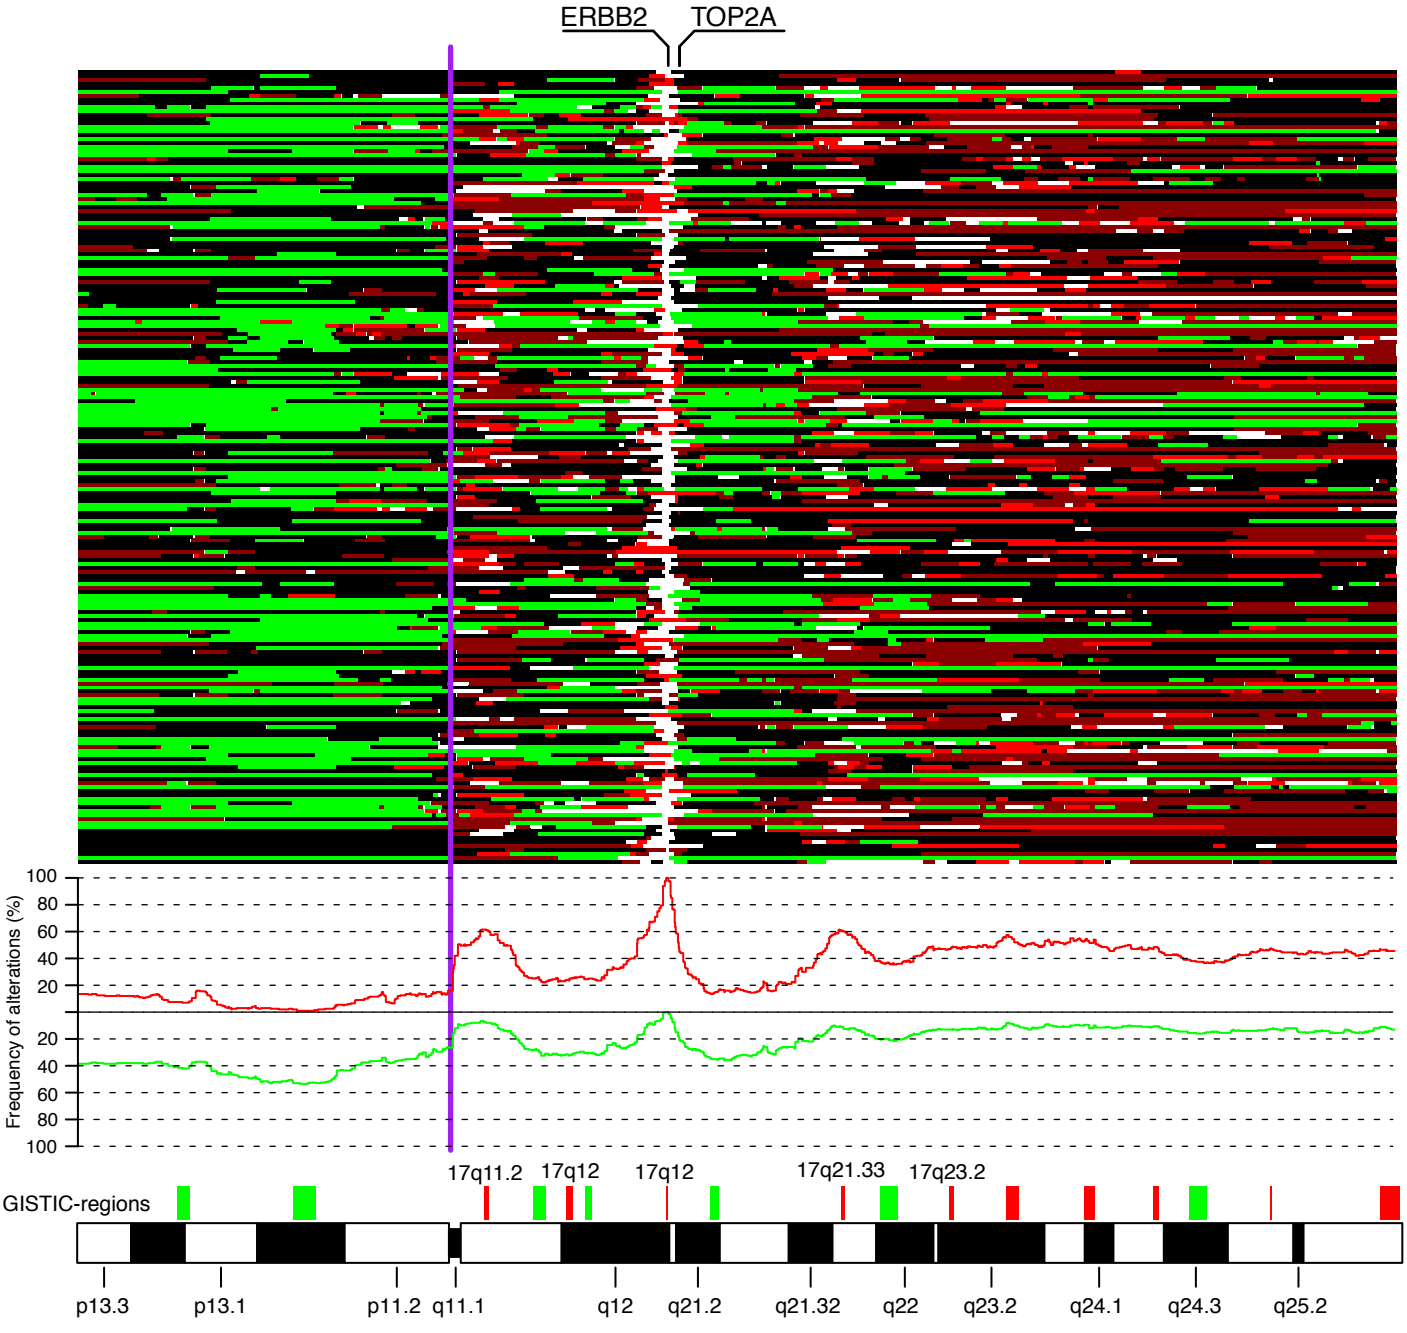

Supplement: MOESM13 [file 9701624]
